# Supplementary material
Source: Research Square preprint supplement (doi:10.21203/rs.3.rs-10150945/v1)
Supplement: Supplementary file 1 [file 66f47cf6d5cd8f8256bdaf76.docx]

#### Appendix 1

#### **Protocol for a randomized controlled trial of** **platelet aggregation function guiding precise antiplatelet therapy for ischemic stroke: rationale and design of the PATH STROKE study**

##### Introduction

###### *Background*

Stroke is a leading global health problem, ranked second as the cause of death worldwide and a major cause of long-term disability.[1] The vast majority of strokes are ischemic, resulting from occlusion of a cerebral artery. Among ischemic strokes, non-cardioembolic subtypes, particularly large artery atherosclerosis and small vessel disease, are most common.[2] Atherosclerosis and enhanced platelet aggregation play central roles in the pathogenesis of non-cardioembolic ischemic stroke, where arterial plaque formation and thrombus development contribute to vessel occlusion and cerebral infarction.[3,4] Given the substantial risk of recurrence, effective secondary prevention strategies are critical. Aspirin (acetylsalicylic acid), through irreversible inhibition of platelet cyclooxygenase-1 and suppression of thromboxane A2 production, remains the cornerstone of antiplatelet therapy for secondary prevention.[5] However, insufficiency in individual response, termed ‘aspirin resistance’, is increasingly recognized, with laboratory studies indicating that a significant proportion of patients exhibit inadequate platelet inhibition despite standard therapy.[5]Aspirin resistance has been associated with a higher risk of recurrent ischemic events, highlighting the need for more individualized treatment approaches.[5]

Efforts to personalize antiplatelet therapy have been explored extensively in coronary artery disease (CAD).[6] Multiple randomized controlled trials (RCTs)[7,8] have assessed the utility of platelet function-guided therapy, and meta-analyses[6] suggest that platelet function assays can assist in optimizing antiplatelet regimens for patients undergoing percutaneous coronary intervention (PCI). Although the pathophysiology and standard treatments differ between CAD and ischemic stroke, the risk associated with ineffective antiplatelet therapy (APT) is comparable. Drawing on experiences from cardiology, experts have proposed that platelet function testing could similarly benefit stroke patients by identifying aspirin non-responders and facilitating timely therapeutic adjustment.[9]

To address this unmet need, we initiated the Precision Antiplatelet Therapy Guided by Platelet Aggregation Function in Patients with Ischemic Stroke (PATH STROKE) trial (ChiCTR2200066530), with a prospective, multicenter design to determine whether tailoring APT based on platelet function testing can reduce antiplatelet resistance and improve clinical outcomes in patients with ischemic stroke.

###### *objectives*

The primary aim of this study is to evaluate the efficacy and safety of a flexible, platelet function-guided APT compared with standard aspirin monotherapy in patients with non-cardioembolic ischemic stroke during the chronic phase (1-3 months after symptom onset). Platelet function is assessed by measuring the maximum aggregation rate (MAR), with a threshold of ≥35% defining high on-treatment platelet reactivity (HOPR). The primary outcome is the incidence of HOPR at 30 ± 5 days following enrolment.

##### Methods

###### *Trial design*

The PATH STROKE study is a multicenter, prospective, randomized controlled, open label, blinded outcome assessed (PROBE) trial conducted through a network of regional hospitals. A planned total of 1018 patients with non-cardioembolic ischemic stroke and taking aspirin will be recruited from China. Patients are centrally randomized (1:1) to guided group or usual care (control) group. All patients in both the guided group and the control group will have a platelet function test at 30±5 days. Study outcomes, assessment of health-related quality of life (HRQoL), and all serious adverse events (SAEs), are collected at 1, 3, 6 months post-randomization.

This study protocol corresponds to Version 4.0, dated May 28, 2024.

###### *Participants, inclusion/exclusion criteria, and procedures*

Patients will be screened from outpatient or inpatient settings if they have experienced an ischemic stroke within the past 1–3 months and have been receiving aspirin therapy at a dose of 100 mg daily for at least 8 days to ensure steady-state drug effects.[10] Additionally, all patients must be candidates for continued long-term APT. (shown in sFigure. 1).


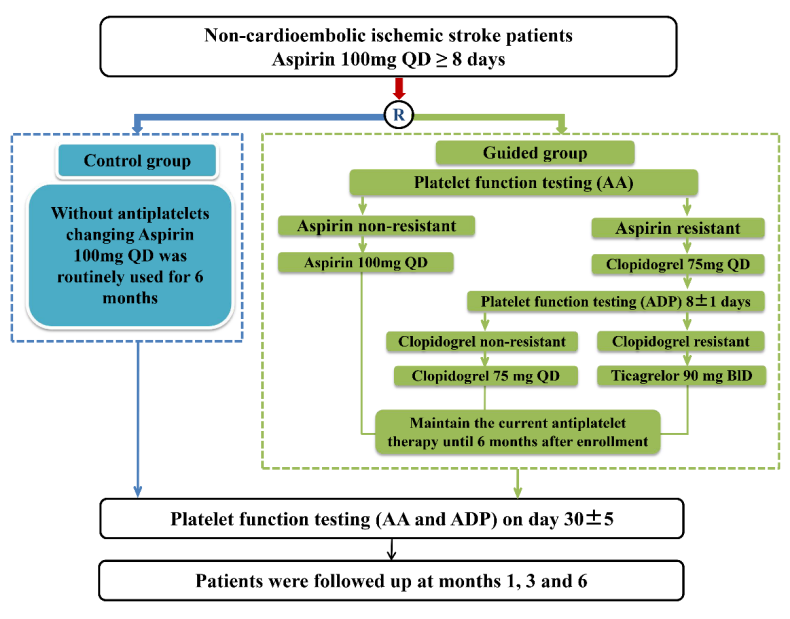


###### sFigure. 1 Study schema

###### *Inclusion criteria*

Patients who meet all of the following criteria are eligible for inclusion in the study: age between 18 and 80 years; diagnosed with non-cardiogenic ischemic stroke according to standard clinical criteria, confirmed by brain CT or MRI; first stroke onset ≥1 month and ≤3 months; d) estimated good pre-morbid function on the modified Rankin scale (mRS, score 0-2; undergoing APT with 100mg aspirin daily for at least 8 days; and ability to provide informed consent signed by the patient or their family member.

###### *Exclusion criteria*

Patients are excluded if they meet any of the following criteria: hemorrhagic stroke or hemorrhagic transformation; history of recurrent stroke; history of gastrointestinal bleeding, intracranial hemorrhage, or other bleeding disorders; contraindications or intolerance to APT medications; severe cardiac, pulmonary, hepatic, or renal insufficiency, or presence of severe comorbid conditions (e.g., end-stage malignant tumors, severe single/multiple organ failure); history of diseases such as atrial fibrillation, congenital heart disease, left ventricular thrombosis, cardiomyopathy or valvular disease; and likely poor compliance or an inability to cooperate with study requirements.

###### *Setting, location and recruitment*

Participants will be recruited from outpatient clinics and inpatient wards of participating hospitals, identified through targeted screening of electronic medical records or databases, prospective screening of outpatients, inpatients, and referrals, and recruitment via advertisements or approved promotional materials. All sites must obtain ethics committee approval and regulatory authorization before enrolment. Screened patients will receive a Patient Information Sheet and Consent Form (PISCF) outlining the PATH STROKE trial objectives, data collection procedures, platelet function testing (1-4 times within 30±5 days), and 6-month follow-up evaluations (See sTable 1). Participants may discuss the study with researchers and may withdraw consent at any time without penalty, with withdrawal recorded in the medical record.

**Table 1 Study visits**

| **Time relative to randomization** | 0 w | 8d | 1m | 3m | 6m | 12m | Close out |
| --- | --- | --- | --- | --- | --- | --- | --- |
| **Window for time for evaluation** | N/A | ±1d | ±5d | ±5d | ±5d | ±5d |  |
| **Fasting blood collection** |  |  |  |  |  |  |  |
| maximum aggregation ratio（MAR） | X | X | X |  |  |  | X |
| Platelet count | X |  |  |  |  |  | X |
| Red blood cell count | X |  |  |  |  |  | X |
| Hemoglobin count | X |  |  |  |  |  | X |
| White blood cell count | X |  |  |  |  |  | X |
| International standard ratio | X |  |  |  |  |  | X |
| Activated partial thromboplastin time (as with heparin) | X |  |  |  |  |  | X |
| Fasting glucose | X |  |  |  |  |  | X |
| HbA1c | X |  |  |  |  |  | X |
| High-density lipoprotein | X |  |  |  |  |  | X |
| Low-density lipoprotein | X |  |  |  |  |  | X |
| Total cholesterol | X |  |  |  |  |  | X |
| Triglyceride | X |  |  |  |  |  | X |
| Liver Function | X |  |  |  |  |  | X |
| Electrolytes | X |  |  |  |  |  | X |
| **Physical measures** |  |  |  |  |  |  |  |
| medication adjustment | X | X | X |  |  |  | X |
| Anthropometrics – Height & Weight | X |  |  |  |  |  | X |
| **Imaging examination** |  |  |  |  |  |  |  |
| CT | X |  |  |  |  |  | X |
| MRI | X |  |  |  |  |  | X |
| CTA/MRA | X |  |  |  |  |  | X |
| CTP/MRP | X |  |  |  |  |  | X |
| **Endovascular Treatment Receipt Status at the Time of Onset** |  |  |  |  |  |  |  |
| Intravenous Thrombolysis and Procedure | X |  |  |  |  |  | X |
| Intra-arterial Thrombolysis and Procedure | X |  |  |  |  |  | X |
| Mechanical Thrombectomy and Procedure | X |  |  |  |  |  | X |
| Stent Implantation and Its Procedure | X |  |  |  |  |  | X |
| **Questionnaires** |  |  |  |  |  |  | X |
| Medical History | X |  |  |  |  |  | X |
| Patient basic education, economic situation | X |  |  |  |  |  | X |
| Sociodemographic | X |  |  |  |  |  | X |
| Lifestyle – smoking, alcohol use | X |  |  |  |  |  | X |
| Concomitant medications | X |  |  | X | X | X | X |
| Adherence & Adverse Events |  |  |  | X | X | X | X |
| Outcomes Ascertainment |  |  |  | X | X | X | X |
| **Health related quality of life** |  |  |  |  |  |  |  |
| EQ-5D-3L |  |  |  | X | X | X | X |
| Modified Rankin scale | X |  |  | X | X | X | X |

EQ-5D: EuroQoL Group 5-Dimension self-report questionnaire;

To maximize retention, verified contact details for participants and at least one close relative will be secured at enrollment. This facilitates scheduling and tracking.

###### *Platelet function testing*

In this study, a point-of-care platelet function testing, PL-12 (SINNOWA Co., Nanjing, China), will be used to determine the maximum platelet aggregation rate (MAR) in patients after initiation of APT. The PL-12 uses arachidonic acid (AA) (2 mg/mL) or adenosine diphosphate (ADP) (50 μmol/L) as inducers, with 40 μL of each added to the sample to induce platelet aggregation. Based on the sequential dynamic counting method, it directly detects the number and volume of platelets in blood samples before and after aggregation using the impedance method, and calculates the platelet aggregation rate accordingly. Two measurements are taken before adding the inducer, and their mean value is used as the initial platelet count. After adding the inducer, three measurements are performed, and the minimum value is used to calculate the MAR, which is determined by the formula: MAR = (1 - minimum platelet count/initial platelet count) × 100%. The entire detection process will be completed within 12-15 minutes.[8,11] The stability and validity of PL-12 have been confirmed in previous clinical studies.[8,11,12] We defined HOPR and aspirin resistance as MRA ≥ 35%, in accordance with a post-hoc analysis of the PRINCE trial. [12]

To ensure standardized procedures for the PL-12 analyzer, the coordinating center, in collaboration with SINNOWA Co., developed a comprehensive Standard Operating Procedure (SOP). Each participating site designated 2-3 full-time nurses as dedicated operators. The coordinating center provided on-site training and conducted regular proficiency assessments with a requirement of ≤5% coefficient of variation (CV) in practical operations. An operational manual was established, specifying critical parameters, such as blood collection requirements and immediate sample testing upon collection. Dynamic quality control measures included monthly inter-instrument comparisons (allowable deviation ≤15%) and mandatory retesting for results with CV >7%. These rigorous protocols achieved a stable CV of ≤5.8% across all sites, ensuring high reproducibility and reliability of multicenter data.

###### *Study treatments*

Eligible participants are randomized to guided group or control group. Antiplatelet drug resistance is defined as a maximum platelet aggregation rate (MAR) ≥35%.[5] The platelet aggregation inducer used depends on the antiplatelet agent: AA for patients receiving aspirin, and ADP for those on clopidogrel or ticagrelor.

Following randomization into the guided therapy group, platelet aggregation testing will be performed immediately. Detailed testing procedures are described in the section on plans for collection and laboratory evaluation. If no aspirin resistance is detected, patients will continue aspirin 100 mg once daily (QD) for 6 months. If aspirin resistance is identified, therapy will be switched to clopidogrel 75 mg QD for 8 days, after which repeat platelet function testing will be conducted. If clopidogrel resistance is not detected, clopidogrel 75 mg QD will be continued for 6 months. If clopidogrel resistance is identified, therapy will be escalated to ticagrelor 90 mg twice daily (BID) for 6 months.

If participants were randomized to the control group, they continued mono-antiplatelet therapy with aspirin 100 mg QD for 6 months.

Allocated intervention may be discontinued or modified in the event of moderate-to-severe bleeding (BARC Type 2, 3, or 5), a new indication for alternative antithrombotic therapy (e.g., new-onset atrial fibrillation, arterial intervention), participant request, or investigator decision based on safety. All concomitant interventions should adhere to guideline-directed standard of care.

###### *Outcomes*

The primary outcome is the incidence of high on-treatment platelet reactivity (HOPR), defined as a MAR ≥35%, at 30 ± 5 days post-randomization. Secondary outcomes include the MAR (continuous variable) at 30 ± 5 days, and the occurrence of major ischemic events (ischemic stroke, transient ischemic attack, myocardial infarction, and vascular death), overall stroke (ischemic or hemorrhagic), ischemic stroke within 6 months. Safety outcomes include bleeding events classified according to the Bleeding Academic Research Consortium (BARC) criteria (grades 2, 3, or 5; and separately, grades 1, 2, 3, or 5), as well as serious adverse events (SAEs) within 6 months. SAEs are defined as events that result in death, are life-threatening, require or prolong hospitalization, cause persistent disability, or are otherwise medically significant. SAEs will be categorized as: (1) death (all-cause, vascular, or non-vascular); (2) life-threatening events; (3) hospitalization or prolonged hospitalization; (4) significant disability; and (5) other medically important events.

###### *Sample size*

Previous studies[13] have reported that approximately 20% of Chinese patients with stroke exhibit HOPR following aspirin therapy. Assuming a 20% incidence of HOPR in the control group and a 40% relative risk reduction in the experimental group, a total sample size of 1,018 patients with non-cardioembolic ischemic stroke is required to achieve 90% power at a two-sided significance level of 0·05. This calculation accounts for an anticipated 5% loss to follow-up and 5% overall non-compliance (2·5% drop-in and 2·5% drop-out).

###### *Randomization and allocation*

Randomization will be conducted through an internet-based web browser using a computer algorithm, which is accessed via password with encryption protection. Once security requirements are satisfied, a series of questions are asked to allow verification of the eligibility of the potential participant for the study. Those satisfying eligibility are randomly assigned to either guided or control group in a 1:1 allocation with stratification according to sex, age (≥65 vs. <65 years), and mRS score (0-1 vs. 2).

###### *Blinding*

The trial is an open-label, blinded-endpoint (PROBE) design. To avoid interference with data quality due to subjective cognitive bias, we established an independent follow-up team and an endpoint adjudication committee (EAC). Outcome assessors are blinded to treatment allocation. Blinding is maintained by ensuring that endpoint adjudicators are independent of the treatment team and have no access to allocation data during outcome assessment.

###### *Statistical methods*

The intention-to-treat (ITT) principle will be applied in the main analysis for all participants who were randomized, regardless of whether they adhered to the protocol, or received the intervention as planned. A per-protocol (PP) analysis will be conducted only for those patients who strictly adhered to all aspects of the protocol.

Baseline characteristics will be summarised as means (standard deviations, SD) or medians (interquartile ranges, IQR) for continuous variables, and counts (percentages) for categorical variables. Between-group comparisons will use the χ² test or t-test, as appropriate.

The primary outcome, the proportion of patients with HOPR at the 30 day follow-up, will be compared between groups using generalized linear models adjusted for sex, age (≥65 vs. <65 years), and baseline mRS score (0–1 vs. 2), with results reported as risk ratios (RRs) and 95% confidence intervals (CIs) and corresponding p-values. Additionally, a sensitivity analysis will be performed using PP population as reference. For secondary time-to-event outcomes of major ischemic events (ischemic stroke, transient ischemic attack, myocardial infarction, and vascular death), overall stroke (ischemic or hemorrhagic), and ischemic stroke within 6 month, the between-group differences will be estimated using Cox proportional hazards models, with results presented as hazard ratios (HRs) and 95% CIs. Kaplan- Meier curves will be generated, and between-group comparisons performed using the log-rank test. Safety outcomes, including defined bleeding events, and SAEs within 6 months will be compared between groups using generalized linear models adjusted for the same covariates, with results reported as RRs and 95% CIs.

Predefined subgroup analyses for the primary outcome will include the age, sex, time from onset to randomization, area of residence (urban/non-urban), history of stroke-related complications (hypertension, diabetes), and pharmacological load (e.g., use of NSAIDs or antidepressants), which will be assessed by adding an interaction term into the model.

Proposed tables related baseline characteristics, data collected during follow-up period and analysis results for primary publication are attached in supplemental materials.

No interim analyses are planned, given the established safety of the antiplatelet agents (aspirin, clopidogrel, ticagrelor) and to avoid increasing the risk of type I error and unblinding. Any missing primary outcomes at 30 days will be handled using a multiple imputation method. A two-sided p value <0.05 will denote statistical significance. All analyses will be conducted using SAS version 14.0 (SAS Institute, Cary, NC, USA).

###### *Data monitoring*

An independent data safety monitoring board (DSMB) will monitor the accumulating data, integrity of the study and patient safety. The DSMB comprises experts in cardiovascular disease and hypertension, clinical trials, biostatistics, and health outcomes. The DSMB meets at least twice yearly to monitor safety, advise on study progress and performance, and make any recommendations regarding study continuation and any changes to the protocol. The DSMB is responsible for advising the Steering Committee as to whether to continue the study, make modifications to the protocol, or terminate the study. Any recommendations will be approved by the Steering Committee before implementation.

###### *Plans for collection, laboratory evaluation, and storage of biological specimens for genetic or molecular analysis in this trial*

In this study, peripheral blood samples (2–3 mL) will be collected for platelet aggregation testing, as described in the Participant Information Sheet and Consent Form (PISCF). Collection and use of biological samples will be performed only after obtaining informed consent from the patient or their legally authorised representative, in strict accordance with ethical and institutional requirements. No additional consent form will be necessary for biological specimen collection. Samples will be collected at baseline (day 1), day 8 post-adjustment (if applicable), and 30±5 days in the experimental group, and at 30±5 days in the control group. All samples will be analysed immediately using the PL-12 analyser (SINNOWA Co., Nanjing, China), a portable SPCM-based device that measures maximal platelet aggregation rate (MAR) via electrical impedance within 12-15 minutes.[8] Blood samples will be used solely for MAR measurement and then disposed of as medical waste, following institutional biosafety protocols. All procedures will prioritise patient rights, safety, and confidentiality, and comply fully with approved ethical standards.

##### Discussion

This study is the first randomised controlled trial specifically designed to determine the efficacy of platelet function-guided precision APT in reducing HOPR compared with standard aspirin therapy in patients with non-cardioembolic ischemic stroke. Observational studies suggest that HOPR is associated with a twofold increase in the risk of ischemic vascular events in patients with a history ischemic stroke. The PATH STROKE trial, therefore, addresses a major area of uncertainty in relation to secondary prevention by targeting HOPR as an approach to result in additional reductions in the risk of recurrent ischemic events.

Previous randomized trials have shown that potent P2Y12 antagonists can lower the risk of HOPR but have failed to show a reduction in recurrent stroke risk. Critically, these studies did not tailor treatment based on individual platelet function, potentially offsetting the benefits of P2Y12 inhibition through increased bleeding risk and treatment discontinuation. Moreover, they focused primarily on P2Y12 receptor antagonists rather than aspirin. In contrast, the PATH STROKE trial adopts an innovative, precision-medicine approach by using platelet function testing to guide therapy in patients treated with aspirin, the most widely used antiplatelet agent worldwide. This strategy is expected to optimise the balance between efficacy and safety, providing a practical and scalable solution to the challenge of aspirin resistance.

Beyond addressing a pressing need in secondary prevention, this study will also generate critical evidence on the broader role of platelet function testing in guiding APT in patients after acute cerebral infarction, with potential applications extending to primary prevention strategies.

In summary, platelet function-guided precision antiplatelet therapy for ischemic stroke has the potential to reduce HOPR and recurrent stroke risk compared with standard aspirin therapy, although this remains unproven. The PATH STROKE trial will provide preliminary proof on the efficacy and safety of this approach and is expected to offer important new insights into the future of precision antiplatelet therapy for ischaemic stroke.

##### Statements

###### Acknowledgment

We would like to thank all the investigators and participants from the PATH STROKE study centers for their support of the study.

###### Statement of Ethics

The study has been approved by the ethics committees of the initiating institutions (Sichuan Provincial People's Hospital and The First Affiliated Hospital of Chengdu Medical College) and all participating centers, approval number [2022CYFYIRB-BA-Nov07]. It is registered on ClinicalTrials.gov (NCT06269432). Written informed consent was obtained from all participating individuals (or their parent/legal guardian/next of kin) prior to their inclusion in the study.

Any protocol amendments will be submitted for approval to the ethics committees and the Steering Committee. Approved modifications will be communicated to all investigators, site personnel, and regulatory bodies via official study newsletters, updated protocol documents, and trial registry updates.

Clinical trial insurance is provided by Asia-Pacific Property & Casualty Insurance Co., Ltd., covering the Sichuan Academy of Medical Sciences & Sichuan Provincial People's Hospital and all participating sites for trial-related injuries.

###### Conflict of Interest Statement

Prof. Craig S. Anderson reports receiving grant funding from the National Health and Medical Research Council (NHMRC) of Australia, the Medical Research Foundation (MRF) of the UK, advisory board fees from AstraZeneca Australia and Auzone Biotech China; he Chairs the data and safety monitoring boards of several investigator-initiated clinical trials, is Editor-in-Chief of Cerebrovascular Diseases, and is President-elect of the World Stroke Organization. Prof. Hisatomi Arima was a member of the journal’s Editorial Board at the time of submission. All other authors declare no conflicts of interest.

###### Data Availability Statement

Access to the data will be granted in accordance with a protocol approved by the Steering Committee; however, trial data will not be made publicly available or deposited in an open-access repository. The central coordinating centre will retain the study data for a minimum of 15 years. Further enquiries can be directed to the corresponding author.The full trial protocol and statistical analysis plan are available upon reasonable request from the corresponding authors or can be accessed via the ClinicalTrials.gov registry (NCT06269432).

##### References

1. Feigin VL, Owolabi MO. Pragmatic solutions to reduce the global burden of stroke: a World Stroke Organization-Lancet Neurology Commission. *Lancet Neurol*. 2023;22:1160–1206. DOI: 10.1016/S1474-4422(23)00277-6
2. Adams HP Jr, Bendixen BH, Kappelle LJ, Biller J, Love BB, Gordon DL, et al. Classification of subtype of acute ischemic stroke. Definitions for use in a multicenter clinical trial. TOAST. Trial of Org 10172 in Acute Stroke Treatment. *Stroke*. 1993;24:35–41. DOI: 10.1161/01.STR.24.1.35
3. Liu L, Chen W, Zhou H, Duan W, Li S, Huo X, et al. Chinese Stroke Association guidelines for clinical management of cerebrovascular disorders: executive summary and 2019 update of clinical management of ischaemic cerebrovascular diseases. *Stroke Vasc Neurol*. 2020;5:159–176. DOI: 10.1136/svn-2020-000378
4. Miyamoto S, Ogasawara K, Kuroda S, Itabashi R, Toyoda K, Itoh Y, et al. Japan Stroke Society Guideline 2021 for the Treatment of Stroke. *Int J Stroke*. 2022;17:1039–1049. DOI: 10.1177/17474930221090347
5. Roman-Gonzalez A, Naranjo CA, Cardona-Maya WD, Vallejo D, Garcia F, Franco C, et al. Frequency of Aspirin Resistance in Ischemic Stroke Patients and Healthy Controls from Colombia. *Stroke Res Treat*. 2021;2021:9924710. DOI: 10.1155/2021/9924710
6. Galli M, Benenati S, Capodanno D, Franchi F, Rollini F, D’Amario D, et al. Guided versus standard antiplatelet therapy in patients undergoing percutaneous coronary intervention: a systematic review and meta-analysis. *Lancet*. 2021;397:1470–1483. DOI: 10.1016/S0140-6736(21)00533-X
7. Cayla G, Cuisset T, Silvain J, Leclercq F, Manzo-Silberman S, Saint-Etienne C, et al. Platelet function monitoring to adjust antiplatelet therapy in elderly patients stented for an acute coronary syndrome (ANTARCTIC): an open-label, blinded-endpoint, randomised controlled superiority trial. *Lancet*. 2016;388:2015–2022. DOI: 10.1016/S0140-6736(16)31323-X
8. Zheng YY, Wu TT, Yang Y, Hou XG, Gao Y, Chen Y, et al. Personalized antiplatelet therapy guided by a novel detection of platelet aggregation function in stable coronary artery disease patients undergoing percutaneous coronary intervention: a randomized controlled clinical trial. *Eur Heart J Cardiovasc Pharmacother*. 2020;6:211–221. DOI: 10.1093/ehjcvp/pvz059
9. Alberts MJ. Platelet function testing for aspirin resistance is reasonable to do: yes! *Stroke*. 2010;41:2400–2401. DOI: 10.1161/STROKEAHA.110.595637
10. Buerke M, Pittroff W, Meyer J, Darius H. Aspirin therapy: optimized platelet inhibition with different loading and maintenance doses. *Am Heart J*. 1995;130:465–472. DOI: 10.1016/0002-8703(95)90353-4
11. Yue C, Lin Z, Lu C, Chen H. Efficacy of Monitoring Platelet Function by an Automated PL-12 Analyzer During the Treatment of Acute Cerebral Infarction With Antiplatelet Medicine. *Clin Appl Thromb Hemost*. 2021;27:10760296211001119. DOI: 10.1177/10760296211001119
12. Yang Y, Chen W, Pan Y, Yan H, Meng X, Liu L, et al. Ticagrelor Is Superior to Clopidogrel in Inhibiting Platelet Reactivity in Patients With Minor Stroke or TIA. *Front Neurol*. 2020;11:534. DOI: 10.3389/fneur.2020.00534
13. Yi X, Zhou Q, Lin J, Chi L. Aspirin resistance in Chinese stroke patients increased the rate of recurrent stroke and other vascular events. *Int J Stroke*. 2013;8:535–539. DOI: 10.1111/j.1747-4949.2012.00929.x
